# Supplementary material for: Improved photocurrent and efficiency of non-fullerene organic solar cells despite higher charge recombination
Source: Royal Society of Chemistry journal article supplement (doi:10.1039/c7ta07501d), 2017-12-04
Supplement: c7ta07501d1.pdf [file c7ta07501d1.pdf]

## Supporting Information

### Improved Photocurrent and Efficiency of Non-fullerene Organic Solar Cells Despite Higher Charge Recombination

Biao Xiao, Jingnan Song, Bing Guo, Minli Zhang, Wanbin Li, Ruixue Zhou, Jiyan Liu, Hong-Bo Wang, Maojie Zhang, Guoping Luo, Feng Liu and Thomas P. Russell

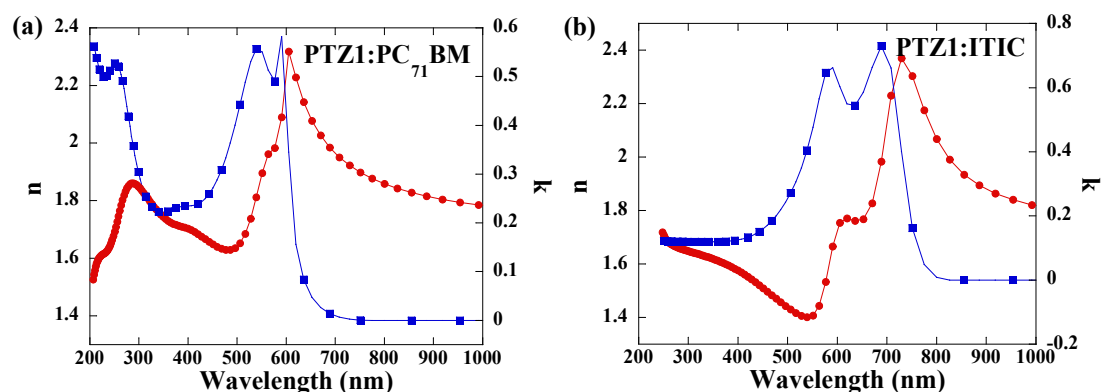

**Figure S1.** Optical constants of the PTZ1:PC<sub>71</sub>BM (a) and PTZ1:ITIC (b) blend layer.

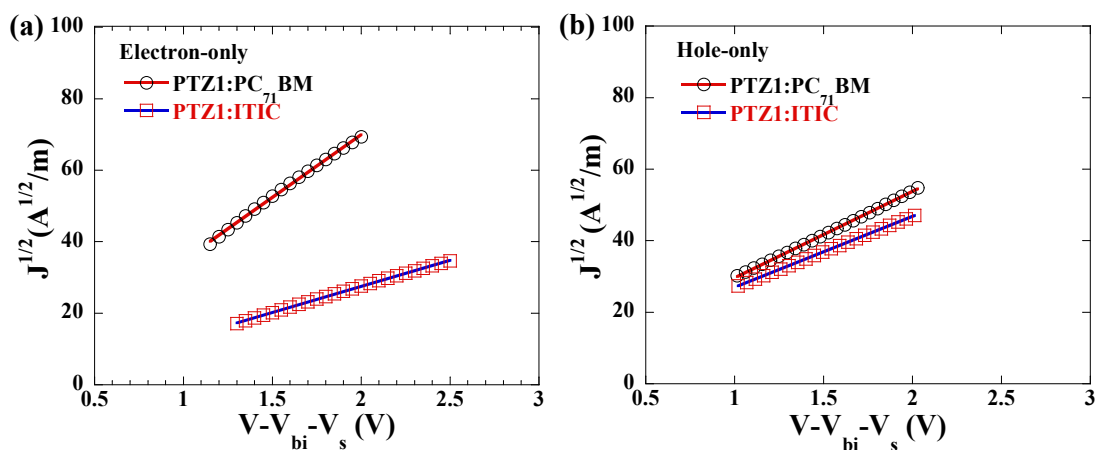

**Figure S2.**  $J^{1/2}$ - $V_{\text{eff}}$  ( $V_{\text{eff}} = V - V_{\text{bi}} - V_{\text{s}}$ ) characteristics for electron-only (a) and hole-only (b) devices. The device configuration for electron-only and hole-only devices are ITO/ZnO/PFN/Active layer/Ca/Al and ITO/PEDOT:PSS/PTZ1:ITIC/MoO<sub>3</sub>/Al, respectively.
